# Supplementary material for: Particulate Matter Exposure and Attention-Deficit/Hyperactivity Disorder in Children: A Systematic Review of Epidemiological Studies
Source: MDPI journal article supplement (doi:10.3390/ijerph17010067), 2019-12-20
Supplement: s1 [file s1]

Particulate matter exposure and Attention-Deficit/Hyperactivity Disorder in children: A systematic review of epidemiological studies.

**Supplementary B.** PECOS criteria for inclusion and exclusion of studies

**Detailed PECOS (population, exposure, comparison, outcome, study type) table for the systematic review on particulate matter and ADHD.**

|          | Population                          | Exposure                                            | Comparison     | Outcome                                         | Type of Study                                                                                         |
|----------|-------------------------------------|-----------------------------------------------------|----------------|-------------------------------------------------|-------------------------------------------------------------------------------------------------------|
| Included | Child population                    | PM air pollution exposure                           | Not applicable | ADHD                                            | Observational studies (cohort, case-control and cross sectional)                                      |
| Excluded | Adults, in vitro and animal studies | Other air pollutants (e.g. ozone, NO <sub>x</sub> ) | Not applicable | Other neurodevelopmental disorder (e.g. autism) | Controlled trials Letters to the editor Reviews<br>Case report<br>Interventional studies<br>Abstracts |
