# Supplementary material for: Particulate Matter Exposure and Attention-Deficit/Hyperactivity Disorder in Children: A Systematic Review of Epidemiological Studies
Source: MDPI journal article supplement (doi:10.3390/ijerph17010067), 2019-12-20
Supplement: s1 [file s1]

Particulate matter exposure and Attention-Deficit/Hyperactivity Disorder in children: A systematic review of epidemiological studies.

### Supplementary C. Quality and risk of bias assessment for each study

The Newcastle-Ottawa scale (Wells G 2013) was adopted in this review to evaluate the quality of cohort and cross-sectional study respectively.

The Office of Health Assessment and Translation (OHAT) by the National Institutes of Environmental Health Sciences National Toxicology Program (NEHS-NTP) (OHAT 2015) and Navigation Guide by the University of California (Lam et al. 2016; Woodruff and Sutton 2014) was adopted to evaluate risk of bias for each included study.

### References

- Wells G, S.B., O'Connell D, Peterson J, Welch V, Losos M, Tugwell P. The Newcastle-Ottawa Scale (NOS) for assessing the quality of nonrandomised studies in meta-analyses. [http://www.ohri.ca/programs/clinical\\_epidemiology/oxford.asp](http://www.ohri.ca/programs/clinical_epidemiology/oxford.asp); 2013
- Zhao, T., Markevych, I., Romanos, M., Nowak, D., & Heinrich, J. (2018). Ambient ozone exposure and mental health: A systematic review of epidemiological studies. *Environmental research*.
- OHAT. Handbook for Conducting Systematic Reviews. Office of Health Assessment and Translation (OHAT) Division of the National Toxicology Program National Institute of Environmental Health Sciences; 2015
- Woodruff, T.J.; Sutton, P. The Navigation Guide systematic review methodology: a rigorous and transparent method for translating environmental health science into better health outcomes. *Environ Health Perspect* 2014;122:1007-1014

| 1. Forns et al., 2018                                       |                                                                          |                    |
|-------------------------------------------------------------|--------------------------------------------------------------------------|--------------------|
| Design                                                      | Cohort study                                                             |                    |
| Participants                                                | Human, aged 3-10 years                                                   |                    |
| Exposure                                                    | PM10, PM2.5, PMcoarse and PM2.5 absorbance.                              |                    |
| Comparison                                                  | 29127 children followed up from 1992 through 2008                        |                    |
| Outcomes                                                    | Attention-Deficit/Hyperactivity Disorder                                 |                    |
| Quality Assessment                                          |                                                                          |                    |
| Newcastle-Ottawa Quality Assessment Scale-Case Cohort Study |                                                                          | Author's judgement |
| Selection                                                   | Representative of the exposed cohort                                     | *                  |
|                                                             | Selection of the non-exposed cohort                                      | *                  |
|                                                             | Ascertainment of exposure                                                | *                  |
|                                                             | Demonstration that outcome of interest was not present at start of study | *                  |
| Comparability                                               | Comparability of cohorts on the basis of the design of analysis          | **                 |
| Outcome                                                     | Assessment of outcome                                                    |                    |
|                                                             | Was follow-up long enough for outcome to occur                           | *                  |
|                                                             | Adequate of follow up of cohorts                                         |                    |
| Risk of Bias Assessment                                     |                                                                          |                    |
| Bias Domain                                                 |                                                                          | Author's judgement |
| Key criteria                                                | Detection bias, exposure assessment                                      | Probably high      |
|                                                             | Detection bias, outcome assessment                                       | Probably high      |
|                                                             | Confounding bias                                                         | Low risk           |
| Other criteria                                              | Selection bias                                                           | Probably low       |
|                                                             | Attrition/exclusion bias                                                 | Low risk           |
|                                                             | Selective reporting bias                                                 | Low risk           |
|                                                             | Conflict of interest                                                     | Low risk           |
|                                                             | Other sources of bias                                                    | Probably low       |

| 2. Markevych et al., 2018                                    |                                                                          |                    |
|--------------------------------------------------------------|--------------------------------------------------------------------------|--------------------|
| Design                                                       | Cohort study                                                             |                    |
| Participants                                                 | Human, aged 10-14                                                        |                    |
| Exposure                                                     | PM10                                                                     |                    |
| Comparison                                                   | 66,823 children followed up from 2000 through 2014                       |                    |
| Outcomes                                                     | Attention-Deficit/Hyperactivity Disorder                                 |                    |
| Quality Assessment                                           |                                                                          |                    |
| Newcastle-Ottawa Quality Assessment Scale-Case Control Study |                                                                          | Author's judgement |
| Selection                                                    | Representative of the exposed cohort                                     | *                  |
|                                                              | Selection of the non-exposed cohort                                      | *                  |
|                                                              | Ascertainment of exposure                                                | *                  |
|                                                              | Demonstration that outcome of interest was not present at start of study | *                  |
| Comparability                                                | Comparability of cohorts on the basis of the design of analysis          | **                 |
| Outcome                                                      | Assessment of outcome                                                    | *                  |
|                                                              | Was follow-up long enough for outcome to occur                           | *                  |
|                                                              | Adequate of follow up of cohorts                                         |                    |
| Risk of Bias Assessment                                      |                                                                          |                    |
| Bias Domain                                                  |                                                                          | Author's judgement |
| Key criteria                                                 | Detection bias, exposure assessment                                      | Probably high      |
|                                                              | Detection bias, outcome assessment                                       | Low                |
|                                                              | Confounding bias                                                         | Probably low       |
| Other criteria                                               | Selection bias                                                           | Probably low       |
|                                                              | Attrition/exclusion bias                                                 | Probably low       |
|                                                              | Selective reporting bias                                                 | Low                |
|                                                              | Conflict of interest                                                     | Low                |
|                                                              | Other sources of bias                                                    | Probably low       |
